# Supplementary material
Source: bioRxiv or medRxiv preprint supplement (https://www.biorxiv.org/highwire/filestream/63605/field_highwire_adjunct_files/0/208975-1.pdf)
Supplement: Supplementary file [file 208975-1.pdf]

SUPPLEMENTAL FIGURES and LEGENDS

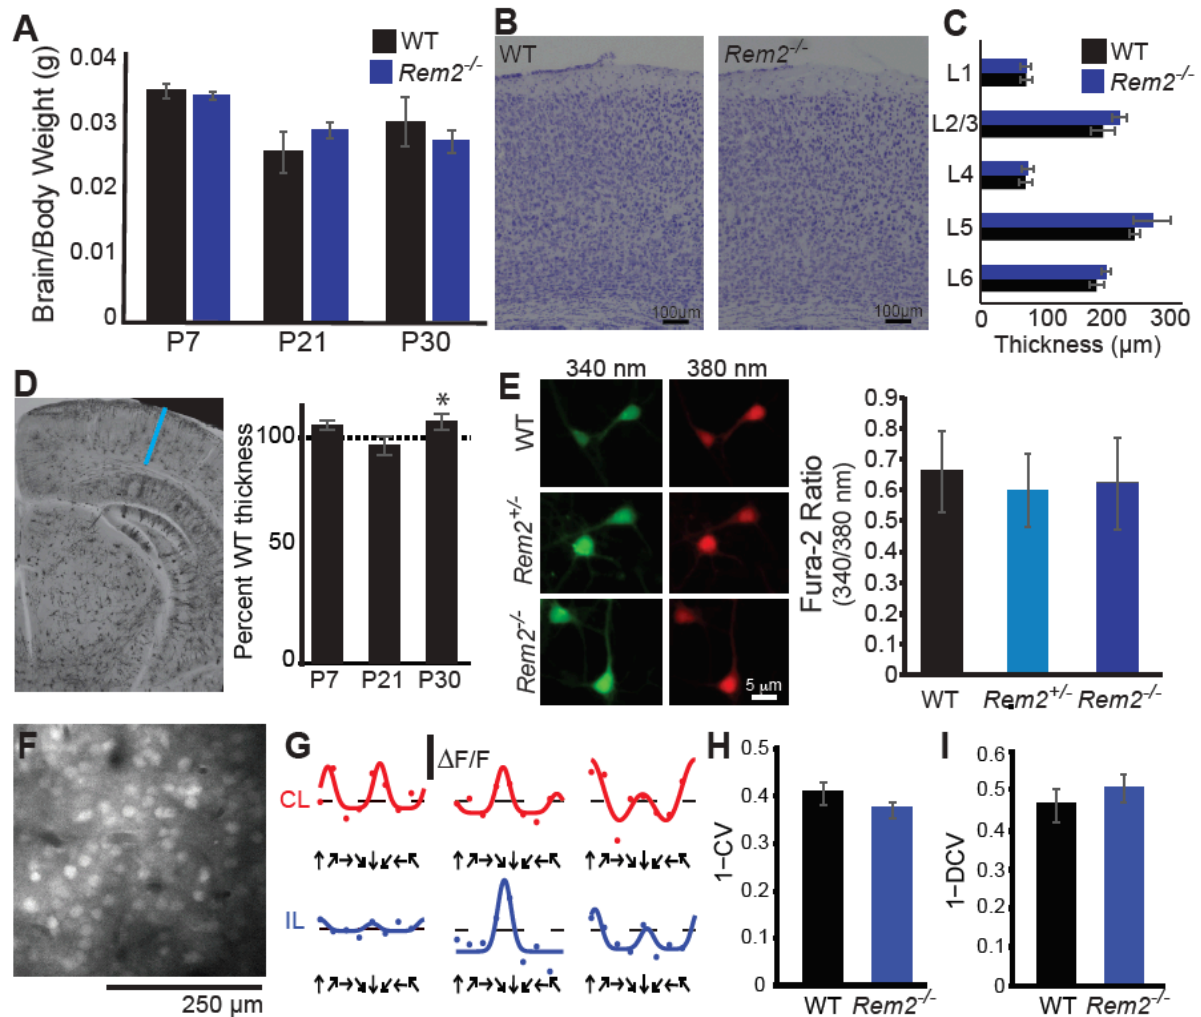

**Figure S1 related to Figure 2: *Rem2*<sup>-/-</sup> mice display no gross anatomical or function cortical abnormalities.** **A)** Brain/body weight ratio of P7, P21 and P30 WT and *Rem2*<sup>-/-</sup> mice. **B)** Representative images of WT and *Rem2*<sup>-/-</sup> Nissl stained brain slices from P16 mice (30 µm sections, scale bar 100 µm). **C)** Cortical layer thickness measured in P16 WT and *Rem2*<sup>-/-</sup> mice (N=3 animals per condition). **D)** (Left) Representative image of visual cortex of P21 mouse brain stained with Golgi-Cox labeling. Blue line shows the distance of cortical thickness measured from the deep extent of L6 to the pial surface. (Right) Percent cortical thickness measured in P7 (N=2 animals per condition), P21 (N=3 animals per condition), and P30 mice (N=4 animals per condition). Data is presented as percent thickness of *Rem2*<sup>-/-</sup> to WT cortical thickness. \*p < 0.05 by student's *t*-test. **E)** (Left) Representative images of Fura-2 calcium acquired at 340 nm (green) and 380 nm (red) in WT, *Rem2*<sup>+/-</sup>, or *Rem2*<sup>-/-</sup> cultured neurons. (Right) The ratio of Fura-2 signal (340 nm/380 nm) measured in WT, *Rem2*<sup>+/-</sup>, or *Rem2*<sup>-/-</sup> cultured cortical neurons. **F)** Representative imaging field of neurons in mouse binocular visual cortex loaded with the calcium indicator dye Oregon Green BAPTA-1AM. Scale bar, 250 µm. **G)** Example responses of 3 cells to visual stimulation (represented as  $\Delta F/F$ , black vertical bar) of the contralateral (C) eye (top; red lines) and ipsilateral (I) eye (bottom; blue lines) with drifting gratings moving in different directions (black arrows). **H)** Orientation selectivity as assessed by circular variance (1-CV) for WT (n=59 cells, N=7 animals) and *Rem2*<sup>-/-</sup> mice (n=82 cells; N=5 animals). **I)** Direction selectivity as assessed by circular variance in direction space (1-DCV) for WT and *Rem2*<sup>-/-</sup> mice. All data is presented as mean  $\pm$  SEM.

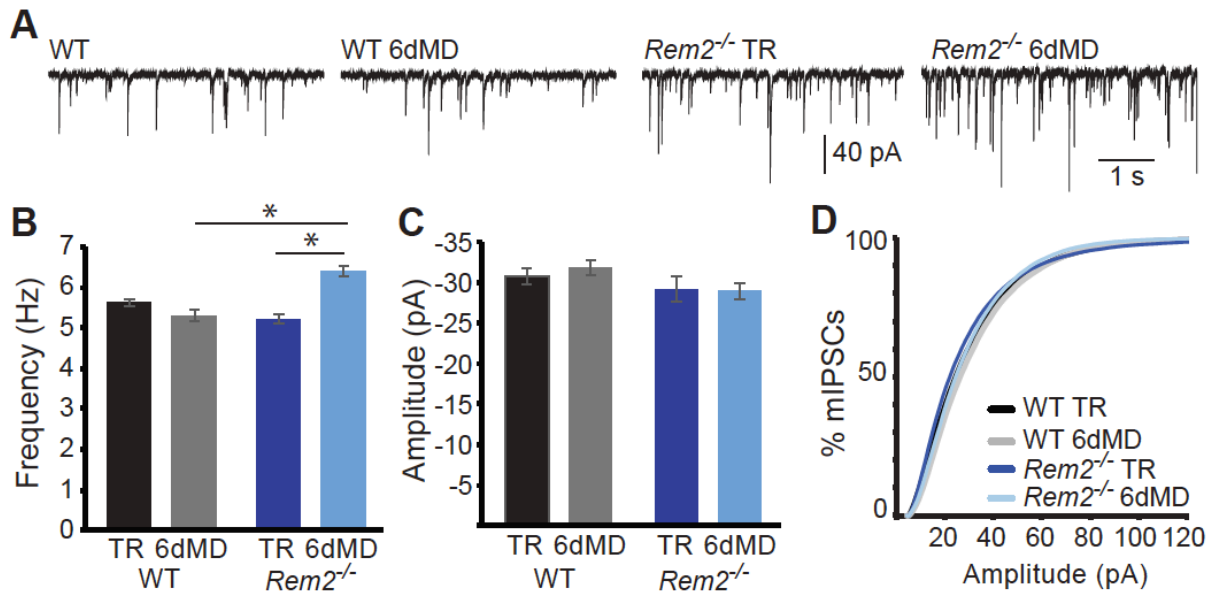

**Figure S2 related to Figure 4. *Rem2*<sup>-/-</sup> does not alter inhibition in layer 2/3 pyramidal neurons. A)** Representative whole-cell recordings of mIPSCs from layer 2/3 pyramidal neurons in V1b in wildtype or *Rem2*<sup>-/-</sup> that were either typically reared (TR) until P32 or monocularly deprived (from P26-P32) for 6 days (6d MD). Quantification of average mIPSC frequency (**B**) and amplitude (**C**) in WT and *Rem2*<sup>-/-</sup> cells (WT TR n=22, WT 6d MD n=17, *Rem2*<sup>-/-</sup> TR n=22, and *Rem2*<sup>-/-</sup> 6d MD n=17). N=3 animals per condition. **D**) Cumulative distribution plot of mIPSC amplitudes in WT TR, WT 6d MD, *Rem2* TR, and *Rem2* MD. Data is presented as mean ± SEM. \*p < 0.05 by two-way ANOVA with Tukey post-hoc.

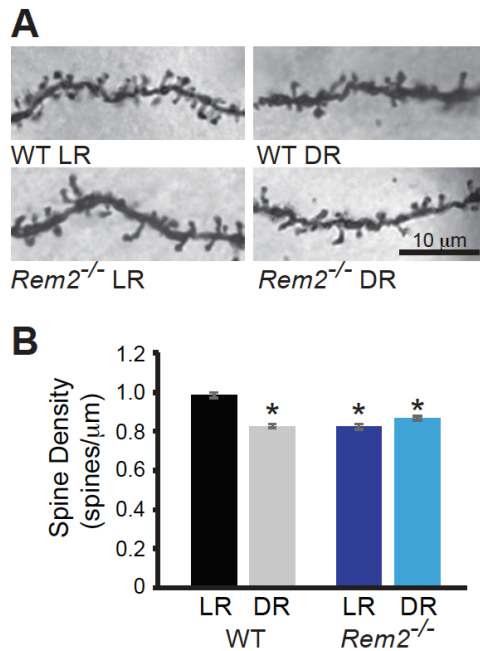

**Figure S3 related to Figure 5. *Rem2*<sup>-/-</sup> mice exhibit decreased spine density *in vivo*.** **A)** Representative images of Golgi-cox labeled dendritic spines. Images were taken from terminal branches off the apical tree 50-100 μm from the cell soma of layer 2/3 pyramidal neurons located in primary visual cortex. Scale bar, 10 μm. **B)** Spine density measured in wildtype and *Rem2*<sup>-/-</sup> mice under normal light rearing conditions (WT LR, n=29 neurons; *Rem2*<sup>-/-</sup> LR, n=29 neurons) or dark reared from P9-P30 (WT DR, n=36 neurons; *Rem2*<sup>-/-</sup> DR n=36 neurons). N=4 animals for WT LR and *Rem2*<sup>-/-</sup> LR and N=5 animals for WT DR and *Rem2*<sup>-/-</sup> DR experiments. Data is presented as mean ± SEM. \* p < 0.05 compared to WT LR by two-way ANOVA followed by Tukey post hoc.

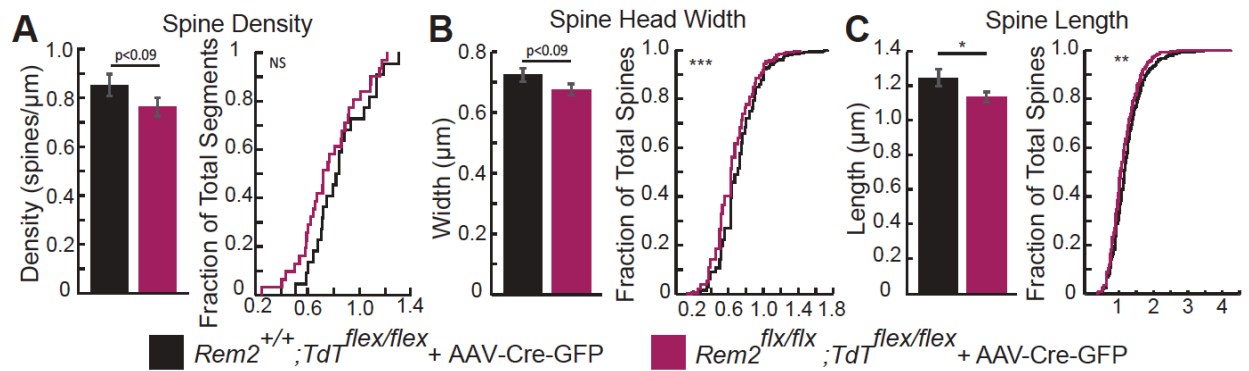

**Figure S4 related to Figure 7. Brief loss of Rem2 results in a modest decrease in spine density and spine remodeling.** **A)** Average spine density (left) and cumulative histogram of spine densities (right) for control  $Rem2^{+/+};Tdt^{flex/flex}$  (black, n=22) or  $Rem2^{flx/flx};Tdt^{flex/flex}$  (orange, n=31) GFP-Cre expressing neurons at 11 days post injection (d.p.i). GFP-Cre expressing neurons from  $Rem2^{flx/flx};Tdt^{flex/flex}$  animals show a trend toward decreased mean spine density compared to control  $Rem2^{+/+};Tdt^{flex/flex}$  neurons ( $p=0.09$ , 2 sample t-test) and a shift in the population of spine densities toward lower values. **B)** Average spine head width (left) and cumulative histogram (right) of spine head measurements from control  $Rem2^{+/+};Tdt^{flex/flex}$  (black, n=22) or  $Rem2^{flx/flx};Tdt^{flex/flex}$  (orange, n=31) GFP-Cre expressing neurons at 11d.p.i. GFP-Cre expressing neurons from  $Rem2^{flx/flx};Tdt^{flex/flex}$  mice show a trend toward decreased mean spine head width compared to control  $Rem2^{+/+};Tdt^{flex/flex}$  neurons ( $p=0.09$ , 2 sample t-test) and a highly significant shift in the distribution of spine head widths toward narrower spine heads ( $p<0.001$ , Kolmogorov-Smirnov test). **C)** Average spine neck length (left) and cumulative histogram (right) of spine neck measurements from control  $Rem2^{+/+};Tdt^{flex/flex}$  (black, n=22) or  $Rem2^{flx/flx};Tdt^{flex/flex}$  mice (orange, n=31) GFP-Cre expressing neurons at 11d.p.i. GFP-Cre expressing neurons from  $Rem2^{flx/flx};Tdt^{flex/flex}$  mice show decreased mean spine neck length compared to control  $Rem2^{+/+};Tdt^{flex/flex}$  ( $p<0.05$ , 2 sample t-test) and a highly significant shift in the distribution of spine head widths toward narrower spine heads ( $p<0.01$ , Kolmogorov-Smirnov test). N=5 animals per condition. Data is presented as mean  $\pm$  SEM (left) and as cumulative distribution plots (right).

SUPPLEMENTAL TABLE

| Statistical Comparison                                                                                                               | Ipsi p-Value | Contra p-value |
|--------------------------------------------------------------------------------------------------------------------------------------|--------------|----------------|
| WT TR vs. WT 2d MD                                                                                                                   | 0.7689       | 0.0149*        |
| WT TR vs. WT 6d MD                                                                                                                   | 0.2242       | 0.0050*        |
| WT 2d MD vs. WT 6d MD                                                                                                                | 0.0678       | 0.8486         |
| <i>Rem2</i> <sup>-/-</sup> TR vs. <i>Rem2</i> <sup>-/-</sup> 2d MD                                                                   | 0.4259       | 0.0031179*     |
| <i>Rem2</i> <sup>-/-</sup> TR vs. <i>Rem2</i> <sup>-/-</sup> 6d MD                                                                   | 0.3594       | 0.1637101      |
| <i>Rem2</i> <sup>-/-</sup> 2d MD vs. <i>Rem2</i> <sup>-/-</sup> 6d MD                                                                | 0.0247*      | 0.1673178      |
| WT TR vs. <i>Rem2</i> <sup>-/-</sup> TR                                                                                              | 0.5419       | 0.5363         |
| WT 2d MD vs. <i>Rem2</i> <sup>-/-</sup> 2d MD                                                                                        | 0.7797       | 0.5264         |
| WT 6d MD vs. <i>Rem2</i> <sup>-/-</sup> 6d MD                                                                                        | 0.5847       | 0.0096*        |
| Adult WT TR vs. Adult WT 10d MD                                                                                                      | 0.0632       | 0.0257*        |
| Adult <i>Rem2</i> <sup>-/-</sup> TR vs. Adult <i>Rem2</i> <sup>-/-</sup> 10d MD                                                      | 0.0598       | 0.6656         |
| Adult WT TR vs. <i>Rem2</i> <sup>-/-</sup> TR                                                                                        | 0.9587       | 0.7801         |
| Adult WT 10d MD vs. <i>Rem2</i> <sup>-/-</sup> 10d MD                                                                                | 0.1709       | 0.0998         |
| <i>Rem2</i> <sup>+/+</sup> ; <i>EMX1</i> <sup>Cre</sup> TR vs. <i>Rem2</i> <sup>+/+</sup> ; <i>EMX1</i> <sup>Cre</sup> 6d MD         | 0.7784       | 0.0440*        |
| <i>Rem2</i> <sup>flx/flx</sup> ; <i>EMX1</i> <sup>Cre</sup> TR vs. <i>Rem2</i> <sup>flx/flx</sup> ; <i>EMX1</i> <sup>Cre</sup> 6d MD | 0.9992       | 0.3774         |
| <i>Rem2</i> <sup>+/+</sup> ; <i>EMX1</i> <sup>Cre</sup> TR vs. <i>Rem2</i> <sup>flx/flx</sup> ; <i>EMX1</i> <sup>Cre</sup> TR        | 0.9990       | 0.9990         |
| <i>Rem2</i> <sup>+/+</sup> ; <i>EMX1</i> <sup>Cre</sup> 6d MD vs. <i>Rem2</i> <sup>flx/flx</sup> ; <i>EMX1</i> <sup>Cre</sup> 6d MD  | 0.7446       | 0.5876         |
| <i>Rem2</i> <sup>+/+</sup> ; <i>PV</i> <sup>Cre</sup> TR vs. <i>Rem2</i> <sup>+/+</sup> ; <i>PV</i> <sup>Cre</sup> 6d MD             | 0.3275       | 0.2828         |
| <i>Rem2</i> <sup>flx/flx</sup> ; <i>PV</i> <sup>Cre</sup> TR vs. <i>Rem2</i> <sup>flx/flx</sup> ; <i>PV</i> <sup>Cre</sup> 6d MD     | 0.7515       | 0.0513         |
| <i>Rem2</i> <sup>+/+</sup> ; <i>PV</i> <sup>Cre</sup> TR vs. <i>Rem2</i> <sup>flx/flx</sup> ; <i>PV</i> <sup>Cre</sup> TR            | 0.9956       | 0.9997         |
| <i>Rem2</i> <sup>+/+</sup> ; <i>PV</i> <sup>Cre</sup> 6d MD vs. <i>Rem2</i> <sup>flx/flx</sup> ; <i>PV</i> <sup>Cre</sup> 6d MD      | 0.7564       | 0.7999         |
| <i>Rem2</i> <sup>+/+</sup> ; <i>VIP</i> <sup>Cre</sup> TR vs. <i>Rem2</i> <sup>+/+</sup> ; <i>VIP</i> <sup>Cre</sup> 6d MD           | 0.0443*      | 0.0875         |
| <i>Rem2</i> <sup>flx/flx</sup> ; <i>VIP</i> <sup>Cre</sup> TR vs. <i>Rem2</i> <sup>flx/flx</sup> ; <i>VIP</i> <sup>Cre</sup> 6d MD   | 0.2417       | 0.0554         |
| <i>Rem2</i> <sup>+/+</sup> ; <i>VIP</i> <sup>Cre</sup> TR vs. <i>Rem2</i> <sup>flx/flx</sup> ; <i>VIP</i> <sup>Cre</sup> TR          | 0.7063       | 0.7400         |
| <i>Rem2</i> <sup>+/+</sup> ; <i>VIP</i> <sup>Cre</sup> 6d MD vs. <i>Rem2</i> <sup>flx/flx</sup> ; <i>VIP</i> <sup>Cre</sup> 6d MD    | 0.5437       | 0.3990         |

**Table S1 related to Figures 3 and 4. Statistical comparisons of Individual Eye Responses as measured for ocular dominance index. Statistical comparisons of Changes in reflectance over baseline reflectance ( $\Delta R/R$ ) for ipsilateral (I) or contralateral (C) eye response vales for wildtype and *Rem2* deletion mice as measured by intrinsic signal imaging. These values correspond to the  $\Delta R/R$  values displayed in Fig. 3C-D and Fig. 4 insets. \* $p \leq 0.05$  by a two-way ANOVA followed by a Tukey test. All other comparisons are not significant.**

| Experimental Condition                      | $V_R$ (mV)                     | $R_{IN}$ (G $\Omega$ ) | $C_M$ (pF)        | Tau (ms)                      |
|---------------------------------------------|--------------------------------|------------------------|-------------------|-------------------------------|
| WT TR                                       | -68.01 $\pm$ 0.43              | 95.09 $\pm$ 1.56       | 113.98 $\pm$ 1.70 | 10.78 $\pm$ 0.21              |
| WT 2d MD                                    | -66.78 $\pm$ 0.38              | 96.46 $\pm$ 2.11       | 108.84 $\pm$ 2.48 | 10.12 $\pm$ 0.15              |
| <i>Rem2</i> <sup>-/-</sup> TR               | -64.98 $\pm$ 0.26              | 111.61 $\pm$ 1.80      | 105.50 $\pm$ 1.95 | 11.44 $\pm$ 0.16              |
| <i>Rem2</i> <sup>-/-</sup> 2d MD            | -68.38 $\pm$ 0.38 <sup>#</sup> | 100.94 $\pm$ 2.25      | 109.70 $\pm$ 2.72 | 10.79 $\pm$ 0.27              |
| WT TR                                       | -64.22 $\pm$ 0.23              | 104.15 $\pm$ 1.64      | 118.55 $\pm$ 1.97 | 12.03 $\pm$ 0.15              |
| WT 6d MD                                    | -64.92 $\pm$ 0.19              | 109.38 $\pm$ 1.10      | 119.94 $\pm$ 1.46 | 10.77 $\pm$ 0.10 <sup>#</sup> |
| <i>Rem2</i> <sup>-/-</sup> TR               | -63.39 $\pm$ 0.43              | 112.06 $\pm$ 1.62      | 124.80 $\pm$ 2.15 | 13.86 $\pm$ 0.29              |
| <i>Rem2</i> <sup>-/-</sup> 6d MD            | -64.38 $\pm$ 0.19              | 99.61 $\pm$ 1.34       | 125.31 $\pm$ 1.61 | 11.96 $\pm$ 0.15              |
| <b>4 days post infection</b>                |                                |                        |                   |                               |
| <i>Rem2</i> <sup>flx/flx</sup> +AAV-GFP     | -67.48 $\pm$ 0.54              | 108.88 $\pm$ 3.81      | 101.69 $\pm$ 2.35 | 11.26 $\pm$ 0.35              |
| <i>Rem2</i> <sup>flx/flx</sup> +AAV-GFP-CRE | -69.38 $\pm$ 0.59              | 101.26 $\pm$ 2.68      | 96.75 $\pm$ 2.59  | 9.66 $\pm$ 0.31               |
| <b>10-12 days post infection</b>            |                                |                        |                   |                               |
| <i>Rem2</i> <sup>flx/flx</sup> +AAV-GFP     | -64.04 $\pm$ 0.56              | 105.87 $\pm$ 3.75      | 111.54 $\pm$ 3.62 | 11.35 $\pm$ 0.39              |
| <i>Rem2</i> <sup>flx/flx</sup> +AAV-GFP-CRE | -64.21 $\pm$ 0.44              | 122.07 $\pm$ 3.10      | 102.56 $\pm$ 2.42 | 12.30 $\pm$ 0.37              |

**Table S2 related to Figure 7. Passive membrane properties of layer 2/3 neurons in visual cortex.**

Passive membrane properties including resting membrane potential ( $V_R$ ), input resistance ( $R_{IN}$ ), membrane capacitance ( $C_M$ ), and Tau measured in layer 2/3 pyramidal neurons in wildtype and *Rem2*<sup>-/-</sup> TR or MD mice for the cells assayed in Figure 7. \* $p \leq 0.05$  compared to WT TR or <sup>#</sup> $p \leq 0.05$  compared to *Rem2*<sup>-/-</sup> TR by a two-way ANOVA followed by a Tukey test. All other comparisons are not significant. For *Rem2*<sup>flx/flx</sup> mice, data is compared using an independent student's *t*-test.
